# Supplementary material for: Neuromuscular and structural tendon adaptations after 6 weeks of either concentric or eccentric exercise in individuals with non-insertional Achilles tendinopathy: protocol for a randomised controlled trial
Source: HighWire-hosted journal article supplement (doi:10.1136/bmjopen-2021-058683), 2022-07-01
Supplement: bmjopen-2021-058683supp006_data_supplement.pdf [file bmjopen-2021-058683supp006_data_supplement.pdf]

## CONSORT 2010 checklist of information to include when reporting a randomised trial\*

| Section and topic                | Items N <sup>o</sup> | Checklist item                                                                                                                                                                              | Page N <sup>o</sup> |
|----------------------------------|----------------------|---------------------------------------------------------------------------------------------------------------------------------------------------------------------------------------------|---------------------|
| <b>Title and abstract</b>        |                      |                                                                                                                                                                                             |                     |
|                                  | 1a                   | Identification as a randomised trial in the title                                                                                                                                           | 1                   |
|                                  | 1b                   | Structured summary of trial design, methods, results, and conclusions                                                                                                                       | 2                   |
| <b>Introduction</b>              |                      |                                                                                                                                                                                             |                     |
| Background and objectives        | 2a                   | Scientific background and explanation rationale                                                                                                                                             | 4-6                 |
|                                  | 2b                   | Specific objectives or hypotheses                                                                                                                                                           | 6                   |
| <b>Methods</b>                   |                      |                                                                                                                                                                                             |                     |
| Trial design                     | 3a                   | Description of trial design (such as parallel, factorial) including allocation ratio                                                                                                        | 7                   |
|                                  | 3b                   | Important changes to methods after trial commencement (such as eligibility criteria), with reasons                                                                                          | N/A                 |
| Participants                     | 4a                   | Eligibility criteria for participants                                                                                                                                                       | 6, 7                |
|                                  | 4b                   | Settings and locations where the data were collected                                                                                                                                        | 7                   |
| Interventions                    | 5                    | The interventions for each group with sufficient details to allow replication, including how and when they were administered                                                                | 10,11               |
| Outcomes                         | 6a                   | Completely defined pre-specified primary and secondary outcome measures, including how and when they were assessed                                                                          | 11,12               |
|                                  | 6b                   | Any changes to trial outcomes after the trial commenced, with reasons                                                                                                                       | N/A                 |
| Sample size                      | 7a                   | How sample size was determined                                                                                                                                                              | 7,8                 |
|                                  | 7b                   | When applicable, explanation of any interim analyses and stopping guidelines                                                                                                                | N/A                 |
| Randomisation:                   |                      |                                                                                                                                                                                             |                     |
| Sequence generation              | 8a                   | Method used to generate the random allocation sequence                                                                                                                                      | 17                  |
|                                  | 8b                   | Type of randomisation; details of any restriction (such as blocking and block size)                                                                                                         | 17                  |
| Allocation concealment mechanism | 9                    | Mechanism used to implement the random allocation sequence (such as sequentially numbered containers), describing any steps taken to conceal the sequence until interventions were assigned | 17                  |
| Implementation                   | 10                   | Who generated the random allocation sequence, who enrolled the participants, and who assigned participants to interventions                                                                 | 17, 18              |
| Blinding                         | 11a                  | If done, who was blinded after assignment to interventions (for example, participants, care providers, those assessing outcomes) and how                                                    | 17, 18              |
|                                  | 11b                  | If relevant, description of the similarity of interventions                                                                                                                                 | N/A                 |
| Statistical methods              | 12a                  | Statistical methods used to compare groups for primary and secondary outcomes                                                                                                               | 18                  |
|                                  | 12b                  | Methods for additional analyses, such as subgroup analyses and adjusted analyses                                                                                                            | N/A                 |

| <b>Results</b>                                       |     |                                                                                                                                                   |          |
|------------------------------------------------------|-----|---------------------------------------------------------------------------------------------------------------------------------------------------|----------|
| Participant flow (a diagram is strongly recommended) | 13a | For each group, the numbers of participants who were randomly assigned, received intended treatment, and were analysed for the primary outcome    | N/A      |
|                                                      | 13b | For each group, losses and exclusions after randomisation, together with reasons                                                                  | N/A      |
| Recruitment                                          | 14a | Dates defining the periods of recruitment and follow-up                                                                                           | N/A      |
|                                                      | 14b | Why the trial ended or was stopped                                                                                                                | N/A      |
| Baseline data                                        | 15  | A table showing baseline demographic and clinical characteristics for each group                                                                  | N/A      |
| Numbers analysed                                     | 16  | For each group, number of participants (denominator) included in each analysis and whether the analysis was by original assigned groups           | N/A      |
| Outcomes and estimation                              | 17a | For each primary and secondary outcome, results for each group, and the estimated effect size and its precision (such as 95% confidence interval) | N/A      |
|                                                      | 17b | For binary outcomes, presentation of both absolute and relative effect size is recommended                                                        | N/A      |
| Ancillary analysis                                   | 18  | Results of any other analyses performed, including subgroup analyses and adjusted analyses, distinguishing pre-specified from exploratory         | N/A      |
| Harms                                                | 19  | All important harms or unintended effects in each group                                                                                           | N/A      |
| <b>Discussion</b>                                    |     |                                                                                                                                                   |          |
| Limitations                                          | 20  | Trial limitations, addressing sources of potential bias, imprecision, and, if relevant multiplicity of analyses                                   | 18-21    |
| Generalisability                                     | 21  | Generalisability (external validity, applicability) of the trial findings                                                                         | 18-21    |
| Interpretation                                       | 22  | Interpretation consistent with results, balancing benefits and harms, and considering other relevant evidence                                     | 18-21    |
| <b>Other information</b>                             |     |                                                                                                                                                   |          |
| Registration                                         | 23  | Registration number and name of trial registry                                                                                                    | 2, 7, 21 |
| Protocol                                             | 24  | Where the full trial protocol can be accessed, if available                                                                                       | N/A      |
| Funding                                              | 25  | Sources of funding and other support (such as supply of drugs), role of funders                                                                   | 22       |

\*We strongly recommend reading this statement in conjunction with the CONSORT 2010 Explanation and Elaboration<sup>13</sup> for important clarifications on all the items. If relevant, we also recommend reading CONSORT extensions for cluster randomised trials,<sup>11</sup> non-inferiority and equivalence trials,<sup>12</sup> non-pharmacological treatments,<sup>32</sup> herbal interventions,<sup>33</sup> and pragmatic trials.<sup>34</sup> Additional extensions are forthcoming: for those and for up to date references relevant to this checklist, see [www.consort-statement.org](http://www.consort-statement.org).

From: Schulz K, Altman D, Moher D. CONSORT 2010 Statement: updated guideline for reporting parallel group randomised trials. *BMJ* 2010; 340:c 332
